# Supplementary material for: From Implicit Participation to Integration: The Evolving Role of Nurses in Oncofertility
Source: Research Square preprint supplement (doi:10.21203/rs.3.rs-8324545/v1), 2026-02-09
Supplement: Supplementary file 1 [file 53c24ab1f3cdeb323500bb10.docx]

**Appendix A: Search Strategy in the PubMed**

| **PubMed Search Strategy** | |
| --- | --- |
| 1 | ("Neoplasms"[Mesh]) OR ("Tumor*" [Title/Abstract] OR "Neoplasm*"[Title/Abstract] OR "Cancer*"[Title/Abstract] OR "Oncology"[Title/Abstract] OR "Malignanc*"[Title/Abstract]) |
| 2 | ("Fertility Preservation"[Mesh] OR "Fertility"[MeSH Terms]) OR ("Fertility"[Title/Abstract] OR "Fertility Preservation"[Title/Abstract] OR "Reproductive Issues"[Title/Abstract] OR "Childbearing"[Title/Abstract] OR "Egg Freezing"[Title/Abstract] OR "Sperm Freezing"[Title/Abstract] OR "Sperm Storage"[Title/Abstract]) |
| 3 | ("Nursing"[MeSH Terms] OR "Nurses"[MeSH Terms]) OR ("Nurse*"[Title/Abstract] OR"Nursing"[Title/Abstract] OR "registered nurse*"[Title/Abstract] OR "nursing staff"[Title/Abstract] OR "clinical nurse*"[Title/Abstract] OR "advanced practice nurse*"[Title/Abstract]) |
| 4 | #1 AND #2 AND #3 |
